# Supplementary material for: ‘Turn-on’ detection of Hg2+ ion using a peroxidase-like split G-quadruplex–hemin DNAzyme
Source: Royal Society of Chemistry journal article supplement (doi:10.1039/b924014d), 2010-01-01
Supplement: b924014d.pdf [file b924014d.pdf]

## “Turn-on” detection of $\text{Hg}^{2+}$ ion using a peroxidase-like split

### G-quadruplex-hemin DNzyme

De-Ming Kong,\* Na Wang, Xiao-Xuan Guo and Han-Xi Shen

#### 1. CD spectra in the presence of hemin

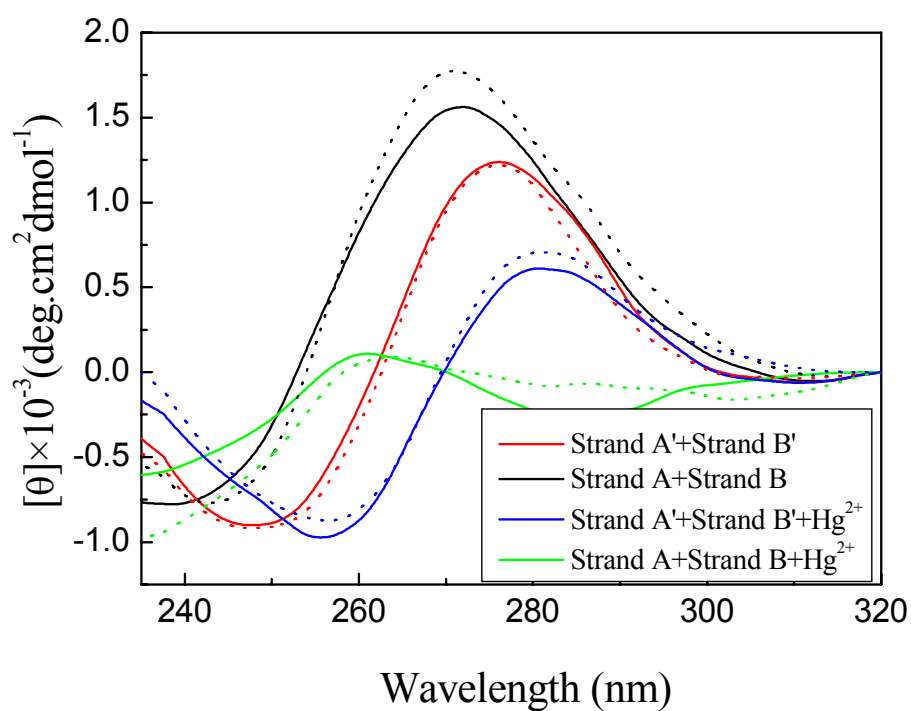

**Fig. S1** CD spectra of the strand A'/strand B' mixture and the strand A/strand B mixture without or with  $2.5 \mu\text{M Hg}^{2+}$  in the absence (solid lines) or presence of  $1 \mu\text{M}$  hemin (dotted lines).

## 2. $\text{Hg}^{2+}$ detection using high concentrations of Strand A and Strand B

**Experimental detail:** The mixture of strand A (0.5  $\mu\text{M}$ ) and strand B (1.0  $\mu\text{M}$ ) was prepared in 10 mM Tris-HAc buffer (pH = 7.0) containing 50 mM KAc and 0.004% (v/v) TritonX-100. The mixture was heated to 90  $^{\circ}\text{C}$  for 5 min to remove aggregates, then cooled slowly to 25  $^{\circ}\text{C}$ , and incubated at 25  $^{\circ}\text{C}$  for 30 min. To this solution was added different concentration of  $\text{Hg}^{2+}$ . The mixture was allowed to incubate at 25  $^{\circ}\text{C}$  for another 30 min. 1  $\mu\text{M}$  of hemin was added to the mixture. The mixture was held for 1h at 25  $^{\circ}\text{C}$ . Then, 3.2 mM of ABTS and 0.5 mM of  $\text{H}_2\text{O}_2$  were added. The absorption spectrum of the reaction product  $\text{ABTS}^{\cdot+}$  was recorded by a TU-1901 UV-Vis spectrophotometer after the reaction had run for 4 min. The absorbance at 420 nm was used for quantitative analysis.

**Results:** when 0.5  $\mu\text{M}$  Strand A and 1.0  $\mu\text{M}$  strand B were used, A linear relationship ( $R^2 = 0.9986$ ) was observed with  $\text{Hg}^{2+}$  concentrations from 0 to 1000 nM, The limit of detection was 60 nM  $\text{Hg}^{2+}$  ion, based on a signal to noise ratio of 3.

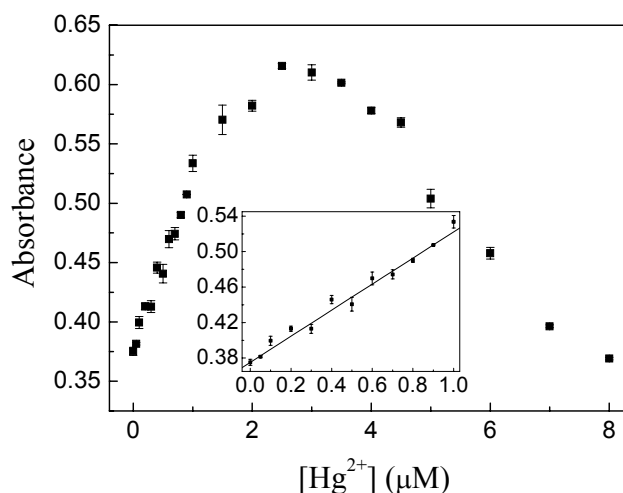

**Fig. S2**  $\text{Hg}^{2+}$  concentration-dependent change in the absorption signal at  $\lambda = 420$  nm. The insert shows the absorption signal change in the  $\text{Hg}^{2+}$  concentration range of 0 ~ 1000 nM. The solid line represents linear fit to the data. All experiments were performed in duplicate.
